# Supplementary material for: Tyr724 phosphorylation of ELMO1 by Src is involved in cell spreading and migration via Rac1 activation
Source: PubMed Central journal article supplement (PMC4513707; doi:10.1186/s12964-015-0113-y), 2015-07-25
Supplement: 12964_2015_113_MOESM6_ESM.pdf [file 12964_2015_113_MOESM6_ESM.pdf]

## Additional file 6: Figure S2

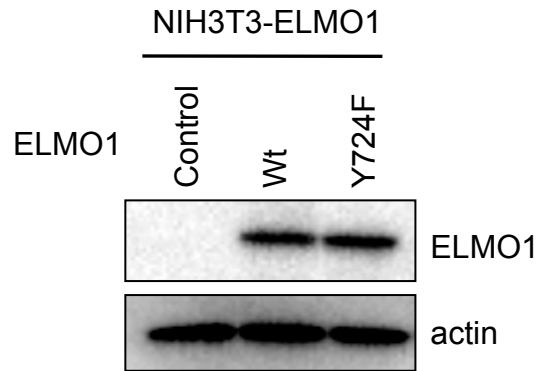

**Makino et al.**
