# Supplementary material for: Tyr724 phosphorylation of ELMO1 by Src is involved in cell spreading and migration via Rac1 activation
Source: PubMed Central journal article supplement (PMC4513707; doi:10.1186/s12964-015-0113-y), 2015-07-25

## Additional file 8: Figure S3

### A NIH3T3-ELMO1

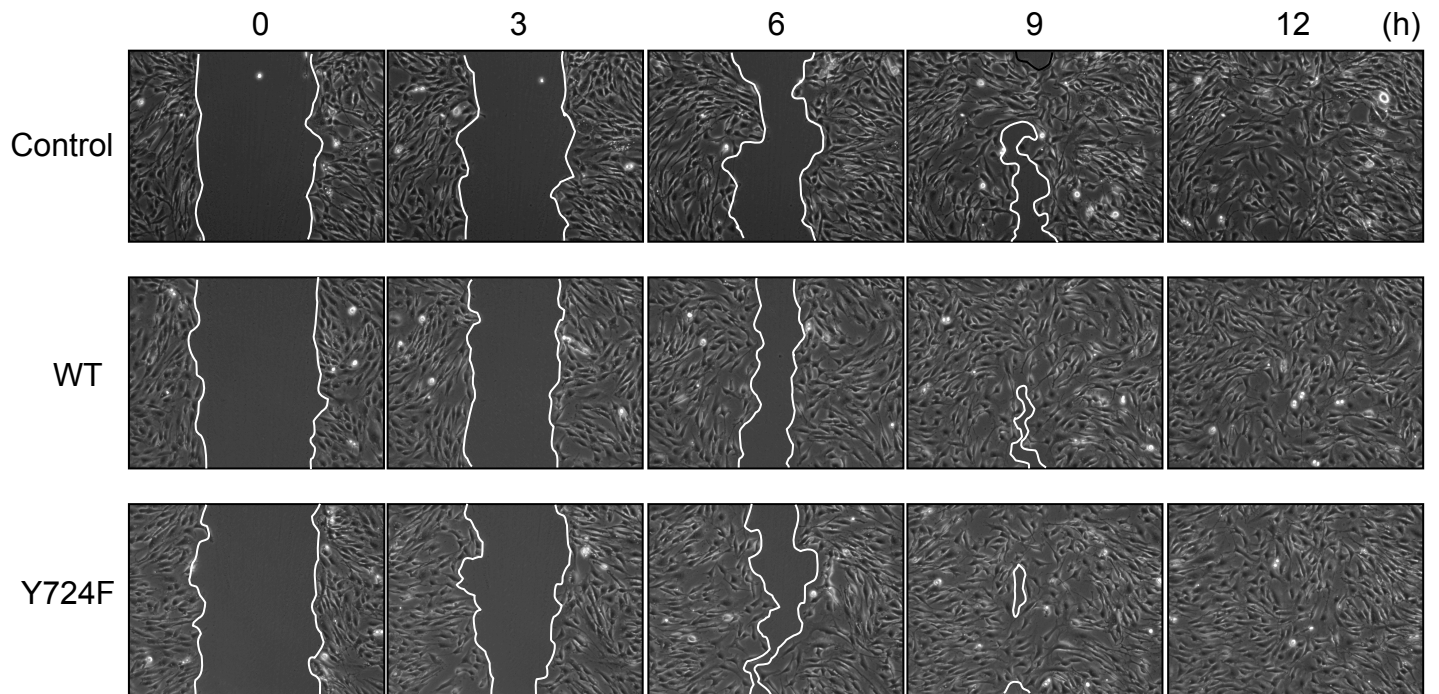

### B NIH3T3-Dock180-ELMO1

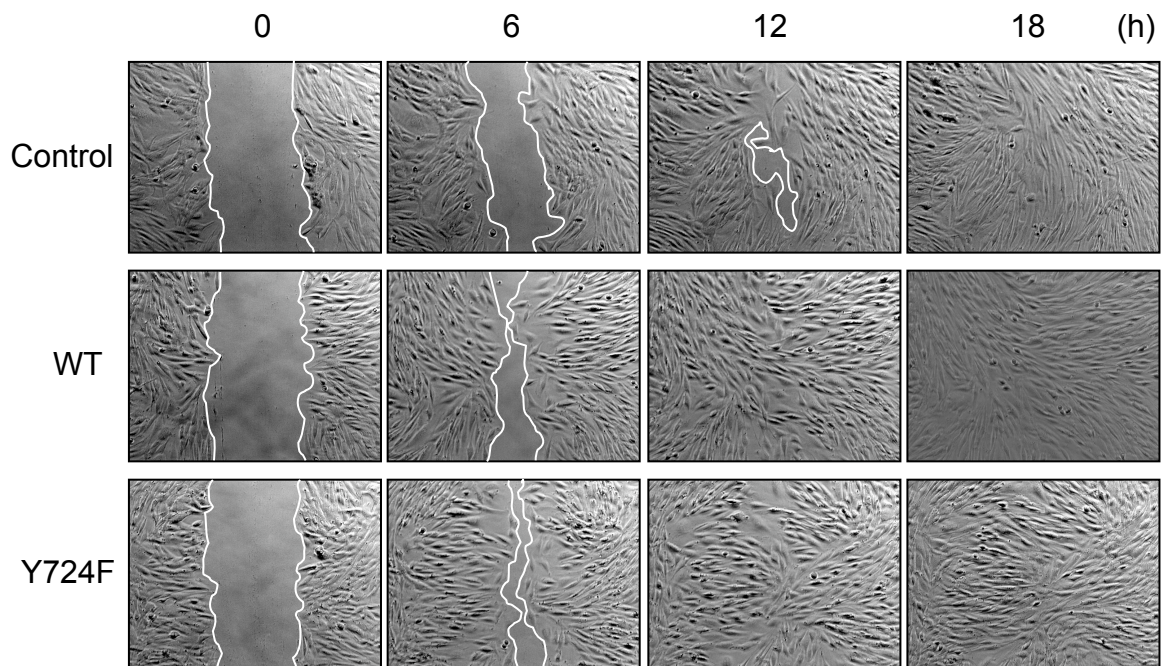

Supplement: 12964_2015_113_MOESM8_ESM.pdf [file 12964_2015_113_MOESM8_ESM.pdf]
